# Supplementary material for: Excess Rab4 rescues synaptic and behavioral dysfunction caused by defective HTT-Rab4 axonal transport in Huntington’s disease
Source: PubMed Central journal article supplement (PMC7331280; doi:10.1186/s40478-020-00964-z), 2020-07-01
Supplement: 40478_2020_964_MOESM1_ESM.pdf [file 40478_2020_964_MOESM1_ESM.pdf]

Supplementary Information for

## **Excess Rab4 rescues synaptic and behavioral dysfunction caused by defective HTT-Rab4 axonal transport in Huntington's disease**

Joseph A White II<sup>†1</sup>, Thomas J Krzystek<sup>†1</sup>, Hayley Hoffmar-Glennon<sup>1</sup>, Claire Thant<sup>1</sup>, Katherine Zimmerman<sup>1</sup>, Gary Iacobucci<sup>1</sup>, Julia Vail<sup>2</sup>, Layne Thurston<sup>1</sup>, Saad Rahman<sup>1</sup>, Shermali Gunawardena\*<sup>1</sup>

\*correspondence: [sg99@buffalo.edu](mailto:sg99@buffalo.edu)

<sup>†</sup> Joseph A White II and Thomas J Krzystek contributed equally to this work.

<sup>1</sup> Department of Biological Sciences, The State University of New York at Buffalo, New York 14260, <sup>2</sup> Department of Biological Engineering, Cornell University, Ithaca, NY

**Author e-mails:** [jdangerwhite@hotmail.com](mailto:jdangerwhite@hotmail.com), [thomaskr@buffalo.edu](mailto:thomaskr@buffalo.edu), [hayleyhg@buffalo.edu](mailto:hayleyhg@buffalo.edu), [claireth@buffalo.edu](mailto:claireth@buffalo.edu), [kzimmerm@buffalo.edu](mailto:kzimmerm@buffalo.edu), [garyiaco@buffalo.edu](mailto:garyiaco@buffalo.edu), [jev52@cornell.edu](mailto:jev52@cornell.edu), [laynethu@buffalo.edu](mailto:laynethu@buffalo.edu), [snrahman@buffalo.edu](mailto:snrahman@buffalo.edu), [sg99@buffalo.edu](mailto:sg99@buffalo.edu).

**Keywords:** Huntingtin, Rab4, axonal transport, synaptic defects, behavioral deficits, *in vivo* imaging, *Drosophila*, iPSCs, Huntington's disease.

**Running title:** Huntingtin-Rab4 vesicle motility is disrupted in HD.

### **This PDF file includes:**

Supplementary Figures S1- S9 and figure legends  
Table S1: Key resources and reagents  
Movie legends

## Supplementary Figure and Movie legends:

**Figure S1. Reduction of *htt* disrupts Rab4 motility and causes Rab4 accumulations in axons.** (a) Arrows depict location of the cell bodies and synapses. Representative images from movies and corresponding kymographs from larvae expressing YFP-Rab4 or YFP-Rab4 with 70% reduction of *htt* (*htt*-RNAi). X axis=distance ( $\mu\text{m}$ ), Y axis=time (s). Bar=10 $\mu\text{m}$ . (b) Quantification of duration weighted segmental velocity ( $\mu\text{m/s}$ ) indicate significant decreases in both anterograde ( $p<0.01$ ) and retrograde ( $p<0.01$ ) YFP-Rab4 vesicle velocities with 70% reduction of *htt*. n=10. (c) Quantification analysis shows that anterograde and retrograde Rab4-vesicle run lengths ( $\mu\text{m}$ ) are significantly decreased ( $p<0.01$ ,  $p<0.01$ ), but that neither pause frequencies ( $\text{sec}^{-1}$ ) nor pause durations (sec) of vesicles are changed (ns) with 70% reduction of *htt*. n=10. (d) Representative images of larval segmental nerves expressing Rab4-mRFP or Rab4-mRFP with *htt*<sup>+/-</sup>. Quantification of Rab4 blocks in larval nerves (#) reveal a significant increase ( $p<0.001$ ) in axonal accumulations of Rab4-mRFP with a 50% genetic reduction of *htt*. n=5. Bar = 10 $\mu\text{m}$ . (e) Representative images of larval segmental nerves expressing Rab4-mRFP that have been immunostained for Rab4 (Abcam, 1:100). Note that Rab4-mRFP (Red arrowhead) and endogenous Rab4 immunostaining (green arrowheads) show a high degree of co-localization (yellow arrowheads) in the merge panel. Quantification of the avg. co-localization by volume of Rab4-mRFP puncta with Rab4 antibody immunostaining reveals an 89.4% co-localization percentage. Pearson's correlation (ImageJ. Coloc2) of the representative image (R) was found to be 0.58, indicative of high confidence in co-localization. n=5. ns= $p>0.01$ , \* $p<0.01$ , \*\* $p<0.001$ , \*\*\* $p<0.0001$ . Statistical significance was determined using the two-sample two-sided Student's t-test.

**Figure S2. Reduction of *htt* causes Rab4 accumulations at synaptic boutons.** (a) Representative images of NMJs from muscle 6/7 segment A4-5 of 3rd instar larvae from *htt*-RNAi (70% reduction) and *htt*<sup>+/-</sup> (50% reduction) stained with HRP-FITC. Bar=5 $\mu\text{m}$ . Quantification analysis shows no significant changes (ns) to the number of synaptic boutons (#) or to the avg. average bouton area ( $\mu\text{m}^2$ ). However, the avg. synaptic length ( $\mu\text{m}$ ) is significantly decreased compared to WT ( $p<0.01$  *htt*-RNAi,  $p<0.01$  *htt*<sup>+/-</sup>). n=8. (b) Representative images from larvae expressing Rab4-mRFP alone or co-expressing Rab4-mRFP with either *htt*-RNAi or *htt*<sup>+/-</sup> that have been stained with HRP-FITC. Note that larvae expressing Rab4-mRFP alone show homogenous Rab4-mRFP within all boutons. However, boutons from larvae expressing Rab4-mRFP with either *htt*-RNAi or *htt*<sup>+/-</sup> show increased Rab4 staining. Bar=5 $\mu\text{m}$ . Quantification analysis of HRP intensity (AU) in larval NMJs show no changes (ns) in HRP intensity across all genotypes; however, quantification of Rab4-mRFP intensity (AU) revealed that larvae co-expressing Rab4-mRFP with either *htt*-RNAi ( $p<0.01$ ) or *htt*<sup>+/-</sup> ( $p<0.01$ ) showed significantly increased Rab4-mRFP intensity compared to larvae expressing Rab4-mRFP alone. When Rab4-mRFP intensity at NMJs was normalized to HRP intensity (AU), quantification revealed a similar significant increase in larvae co-expressing Rab4-mRFP with either *htt*-RNAi ( $p<0.01$ ) or *htt*<sup>+/-</sup> ( $p<0.001$ ) compared to larvae expressing Rab4-mRFP alone. AU=arbitrary units. n=8. ns= $p>0.01$ , \* $p<0.01$ , \*\* $p<0.001$ , \*\*\* $p<0.0001$ . Statistical significance was determined using the two-sample two-sided Student's t-test.

**Figure S3. Reductions of *klc*, *kfp64d*, or *unc-104* cause Rab4 axonal blockages within larval axons.** (a) Representative images of Rab4-mRFP larval nerves alone or in the context of 50% reduction of either *klc*, *kfp64d*, or *unc-104*. Note the presence of Rab4 axonal blockages in larval axons (white arrowheads) in larvae co-expressing Rab4-mRFP with either *klc*<sup>+/-</sup>, *kfp64d*<sup>+/-</sup>, or *unc-104*<sup>+/-</sup>. bar=10 $\mu\text{m}$ . Quantification of the average number (#) of Rab4 blocks per larvae reveal that larvae expressing Rab4-mRFP in the context of 50% reduction of *klc* ( $p<0.01$ ), *kfp64d* ( $p<0.001$ ), or *unc-104* ( $p<0.01$ ) show significant amounts Rab4-mRFP blocks compared to Rab4-mRFP expressing larvae (WT). n=5. (b) Sub-pixel immunofluorescence analysis revealed Rab4-mRFP (red arrows) and rip11-GFP (green arrows) co-localize (yellow arrows) within larval axons. Intensity-pixel plots show overlapping (purple arrows) peak intensities for Rab4 (red) and rip11 (green). n=5. ns= $p>0.01$ , \* $p<0.01$ , \*\* $p<0.001$ , \*\*\* $p<0.0001$ . Statistical significance was determined using the two-sample two-sided Student's t-test.

**Figure S4. HTT15Q-mRFP motility within larval axons depends on endogenous *htt*.** (a) Representative movies with kymographs from HTT15Q-mRFP larvae alone or in the context of 70% reduction of *htt* (*htt*-RNAi) or a 50% genetic reduction of *htt* (*htt*<sup>+/-</sup>, [Df(98E2) CG9990]). Bar=10 $\mu\text{m}$ . Quantification indicates significant decreases in the duration weighted segmental anterograde HTT15Q-mRFP velocities with *htt*-RNAi ( $p<0.00001$ ) or *htt*<sup>+/-</sup> ( $p<0.0001$ ) and significant decreases in the duration weighted segmental retrograde HTT15Q-mRFP velocities with *htt*-RNAi ( $p<0.001$ ) or *htt*<sup>+/-</sup> ( $p<0.001$ ). (b) Quantification of Rab4-mRFP motility dynamics showed that 50% reduction of *hip1* significantly decreased Rab4-mRFP retrograde run lengths ( $p<0.01$ ) and retrograde pause frequencies ( $p<0.01$ ), but had no effect (ns) on anterograde run lengths, anterograde pause frequencies, anterograde pause durations, or retrograde pause durations. n=10. (c) Quantification of HTT15Q-mRFP motility dynamics showed that 50% reduction

of hip1 significantly decreased HTT15Q-mRFP retrograde run lengths ( $p < 0.01$ ), but had no effect ( $ns$ ) on anterograde run lengths, anterograde pause frequencies, retrograde pause frequencies, anterograde pause durations, or retrograde pause durations.  $n=10$ .  $ns=p > 0.01$ ,  $*p < 0.01$ ,  $**p < 0.001$ ,  $***p < 0.0001$ ,  $****p < 0.00001$ . Statistical significance was determined using the two-sample two-sided Student's t-test.

**Figure S5. mCherry-Rab4 motility is disrupted in iNeurons differentiated from HD patient iPSCs.** (a) Representative images of HD (72Q) patient iPSCs stained with the pluripotent marker OCT4 (i). HD-patient NPCs stained with NESTIN (ii). HD-patient iPSCs differentiated to iNeurons stained with MAP2 and BIII-tubulin. Hoechst was used to stain nuclei. (b-d) Electrophysiological analysis of WT and HD patient-derived iNeurons. Note that these iNeurons elicit action potentials that are abolished in the presence of TTX. Electrophysiological analysis of WT and HD patient-derived iNeurons exhibit changes in Na<sup>+</sup> and K<sup>+</sup> currents that are sensitive to either TTX or TEA respectively. (e) Significant decreases in both the anterograde ( $p < 0.01$ ) and retrograde ( $p < 0.01$ ) run lengths of mCherry-Rab4 containing vesicles are seen.  $n=7$ .  $ns=p > 0.01$ ,  $*p < 0.01$ . Statistical significance was determined using the non-parametric Wilcoxon–Mann–Whitney rank sum test.

**Figure S6. Rab4 localizes with polyQ and HTT accumulations in HD iNeurons differentiated from HD patient iPSCs.** (a) Representative image of an axonal blockage (arrow) containing HTT and Rab4 is seen in a neurite differentiated from HD-patient iPSC with 109Q repeats, using an antibody against HTT and Rab4. Intensity plots show overlapping peak (purple arrow). X=distance ( $\mu\text{m}$ ), Y=intensity (AU). Bar=5 $\mu\text{m}$ . (b) Representative images from normal (WT) neurons derived from a normal individual (25Q) and HD iNeurons derived from a HD patient (72Q) stained with antibodies to Rab4 (green arrows), polyQ (red arrows) and Hoechst (blue). Co-localization of Rab4 and polyQ is seen in WT neurons (yellow arrows). Not all Rab4 puncta (green arrows) or polyQ puncta (red arrows) co-localize. Accumulations of Rab4 (green arrows) and polyQ (red arrows) are seen at the proximal end of the HD iNeurons. Only a few puncta show co-localization (yellow arrows). Bar=5 $\mu\text{m}$ . Intensity plots show overlapping peaks in WT iNeurons (purple arrows). Plots from HD iNeurons show red and green peaks with fewer overlapping peaks (purple). X=distance ( $\mu\text{m}$ ), Y=intensity (AU). (c,d) Representative high-resolution images from WT iNeurons stained for Rab4 and DIC (c), Rab4 and HIP1 (d) show Rab4 co-localizes with DIC or HIP1 (yellow arrows). The HD iNeurons show Rab4 only (red arrows) or DIC or HIP1 only (green arrows) puncta (Bar = 5 $\mu\text{m}$ ). Intensity plots show Rab4 and DIC or Rab4 and HIP1 overlapping puncta (purple arrows) in WT iNeurons, while in HD iNeurons only Rab4 (red) and DIC or HIP1 (green) puncta are seen. X=distance ( $\mu\text{m}$ ), Y=intensity (AU).

**Figure S7. The putative HTT-Rab4 synaptic complex is disrupted in HD iNeurons differentiated from HD patient iPSCs.** (a) Analysis of total proteins from WT and HD iNeuronal culture homogenates using antibodies to HTT, Rab4, HIP1, DIC, KIF5C, Rab11-FIP5 and actin (loading control). Both full length (FL-HTT) and HTT fragments are observed in WT and HD iNeuronal cultures. Molecular weight ladder is indicated in Kd. Quantifications of band intensity on western blots (AU) revealed that DIC ( $p < 0.005$ ) and HIP1 ( $p < 0.005$ ) levels are significantly decreased in HD compared to WT. The level of KIF5C is also decreased in HD compared to WT although this was not significant ( $ns$ ). The level of Rab4 and HTT show an increased trend in HD compared to WT. A trend towards increased levels is also seen for Rab11-FIP5 in HD compared to WT. Y axis=normalized intensity to WT (AU). Protein levels were normalized to actin and then to WT.  $n=3$ .  $ns=p > 0.05$ ,  $*p < 0.05$ ,  $**p < 0.005$ . Statistical significance was determined using the two-sample two-sided Student's t-test.

**Figure S8. Expression of pathogenic HTT in Drosophila larval axons cause Rab4 blockages within larval axons and elevated Rab4 levels at NMJs.** (a) Larvae expressing HTT103Q-eGFP and Rab4-mRFP show axonal blockages that contain both HTT and Rab4 (arrows). Bar= 5 $\mu\text{m}$ . (b) Expression of Rab4-mRFP with HTT16Q or HTT128Q does not affect the average number of axonal blocks ( $ns$ ).  $n=8$ . (c) Representative images of NMJs from muscle 6/7 segment A4-5 in larvae expressing Rab4-mRFP alone or co-expressing Rab4-mRFP with either HTT16Q or HTT128Q stained with HRP-FITC. Note that larvae expressing Rab4-mRFP alone show homogenous Rab4-mRFP within all boutons, which is seemingly lost with HTT128Q. Bar=5 $\mu\text{m}$ . Quantification analysis of HRP intensity (AU) in larval NMJs show no changes ( $ns$ ) in HRP intensity across all genotypes; however, quantification of Rab4-mRFP intensity (AU) revealed that larvae co-expressing Rab4-mRFP with either HTT128Q showed significantly increased Rab4-mRFP intensity compared to larvae expressing Rab4-mRFP alone ( $p < 0.0001$ ) or to larvae co-expressing Rab4-mRFP with HTT16Q ( $p < 0.001$ ). When Rab4-mRFP intensity at NMJs was normalized to HRP intensity (AU), quantification revealed a similar significant increase in larvae co-expressing Rab4-mRFP with HTT128Q compared to larvae expressing Rab4-mRFP alone ( $p < 0.001$ ) or to larvae co-expressing Rab4-mRFP with HTT16Q ( $p < 0.001$ ). Note that larvae expressing Rab4-mRFP alone and larvae co-expressing Rab4-mRFP with HTT16Q show unchanged intensities

at NMJs (ns). AU=arbitrary units. n=8.  $ns=p>0.01$ ,  $*p<0.01$ ,  $**p<0.001$ ,  $***p<0.0001$ . Statistical significance was determined using the two-sample two-sided Student's t-test.

**Figure S9. A model of the putative moving HTT-Rab4 vesicle and how it is disrupted in HD.** (a) Our observations propose a working model where a specific HTT-Rab4 vesicle complex that contains synaptic SNARE proteins synaptotagmin and synaptobrevin, and Rab11 is attached to molecular motors kinesin and dynein via HIP1 and is transported down axons for synaptic function. (b) In HD, polyQ-HTT present with this HTT-Rab4 vesicle disrupts associations between accessory proteins by decreasing the binding affinity of HIP1. Together, these aberrant associations dislocate the link between the polyQ-HTT-Rab4 vesicle and motor proteins kinesin-1 and dynein, resulting in the perturbation of its motility within axons causing synaptic and locomotion defects.

#### **Movie S1**

A representative movie from a larva expressing HTT25Q-eGFP (green) and Rab4-mRFP (red). Note that HTT and Rab4 co-migrate (yellow puncta) within larval axons.

#### **Movie S2**

A representative movie from a larva expressing Rab4-mRFP (red) and APP-YFP (green). Note that APP-YFP (green) and Rab4-mRFP (red) do not co-migrate within larval axons.

#### **Movie S3**

A representative movie from a larva expressing HTT-mRFP (red) and APP-YFP (green). Note that HTT-mRFP (red) and APP-YFP (green) co-migrate (yellow) within larval axons.

#### **Movie S4**

A representative movie from a larva expressing Rab4-mRFP (red) and nSyb-GFP (green). Note that nSyb-GFP (green) and Rab4-mRFP (red) co-migrate (yellow) within larval axons.

#### **Movie S5**

A representative movie from a larva expressing Rab4-mRFP (red) and Syt-GFP (green). Note that Syt-GFP (green) and Rab4-mRFP (red) co-migrate (yellow) within larval axons.

#### **Movie S6**

A representative movie from a larva expressing HTT15Q-mRFP (red) and nSyb-GFP (green). Note that nSyb-GFP (green) and HTT15Q-mRFP (red) co-migrate (yellow) within larval axons.

#### **Movie S7**

A representative movie from a larva expressing HTT15Q-mRFP (red) and Syt-GFP (green). Note that Syt-GFP (green) and HTT15Q-mRFP (red) co-migrate (yellow) within larval axons.

#### **Movie S8**

A representative movie from a larva expressing HTT15Q-mRFP (red) and Rab11-GFP (green). Note that Rab11-GFP (green) and Rab4-mRFP (red) co-migrate (yellow) within larval axons.

#### **Movie S9**

A representative movie from a larva expressing Rab4-mRFP (red) and Rab11-GFP (green). Note that Rab11-GFP (green) and Rab4-mRFP (red) co-migrate (yellow) within larval axons.

#### **Movie S10**

A representative movie from a larva expressing Rab4-mRFP (red) and YFP-Rab3 (green). Note that YFP-Rab3 (green) and Rab4-mRFP (red) do not co-migrate within larval axons.

#### **Movie S11**

A representative movie from a normal (WT) human iNeuron transfected with mCherry-Rab4 shows that Rab4 moves bi-directionally within the human neurite.

#### **Movie S12**

A representative movie from a HD patient iNeuron (Q72) transfected with mCherry-Rab4 shows that the motility of Rab4 is decreased.

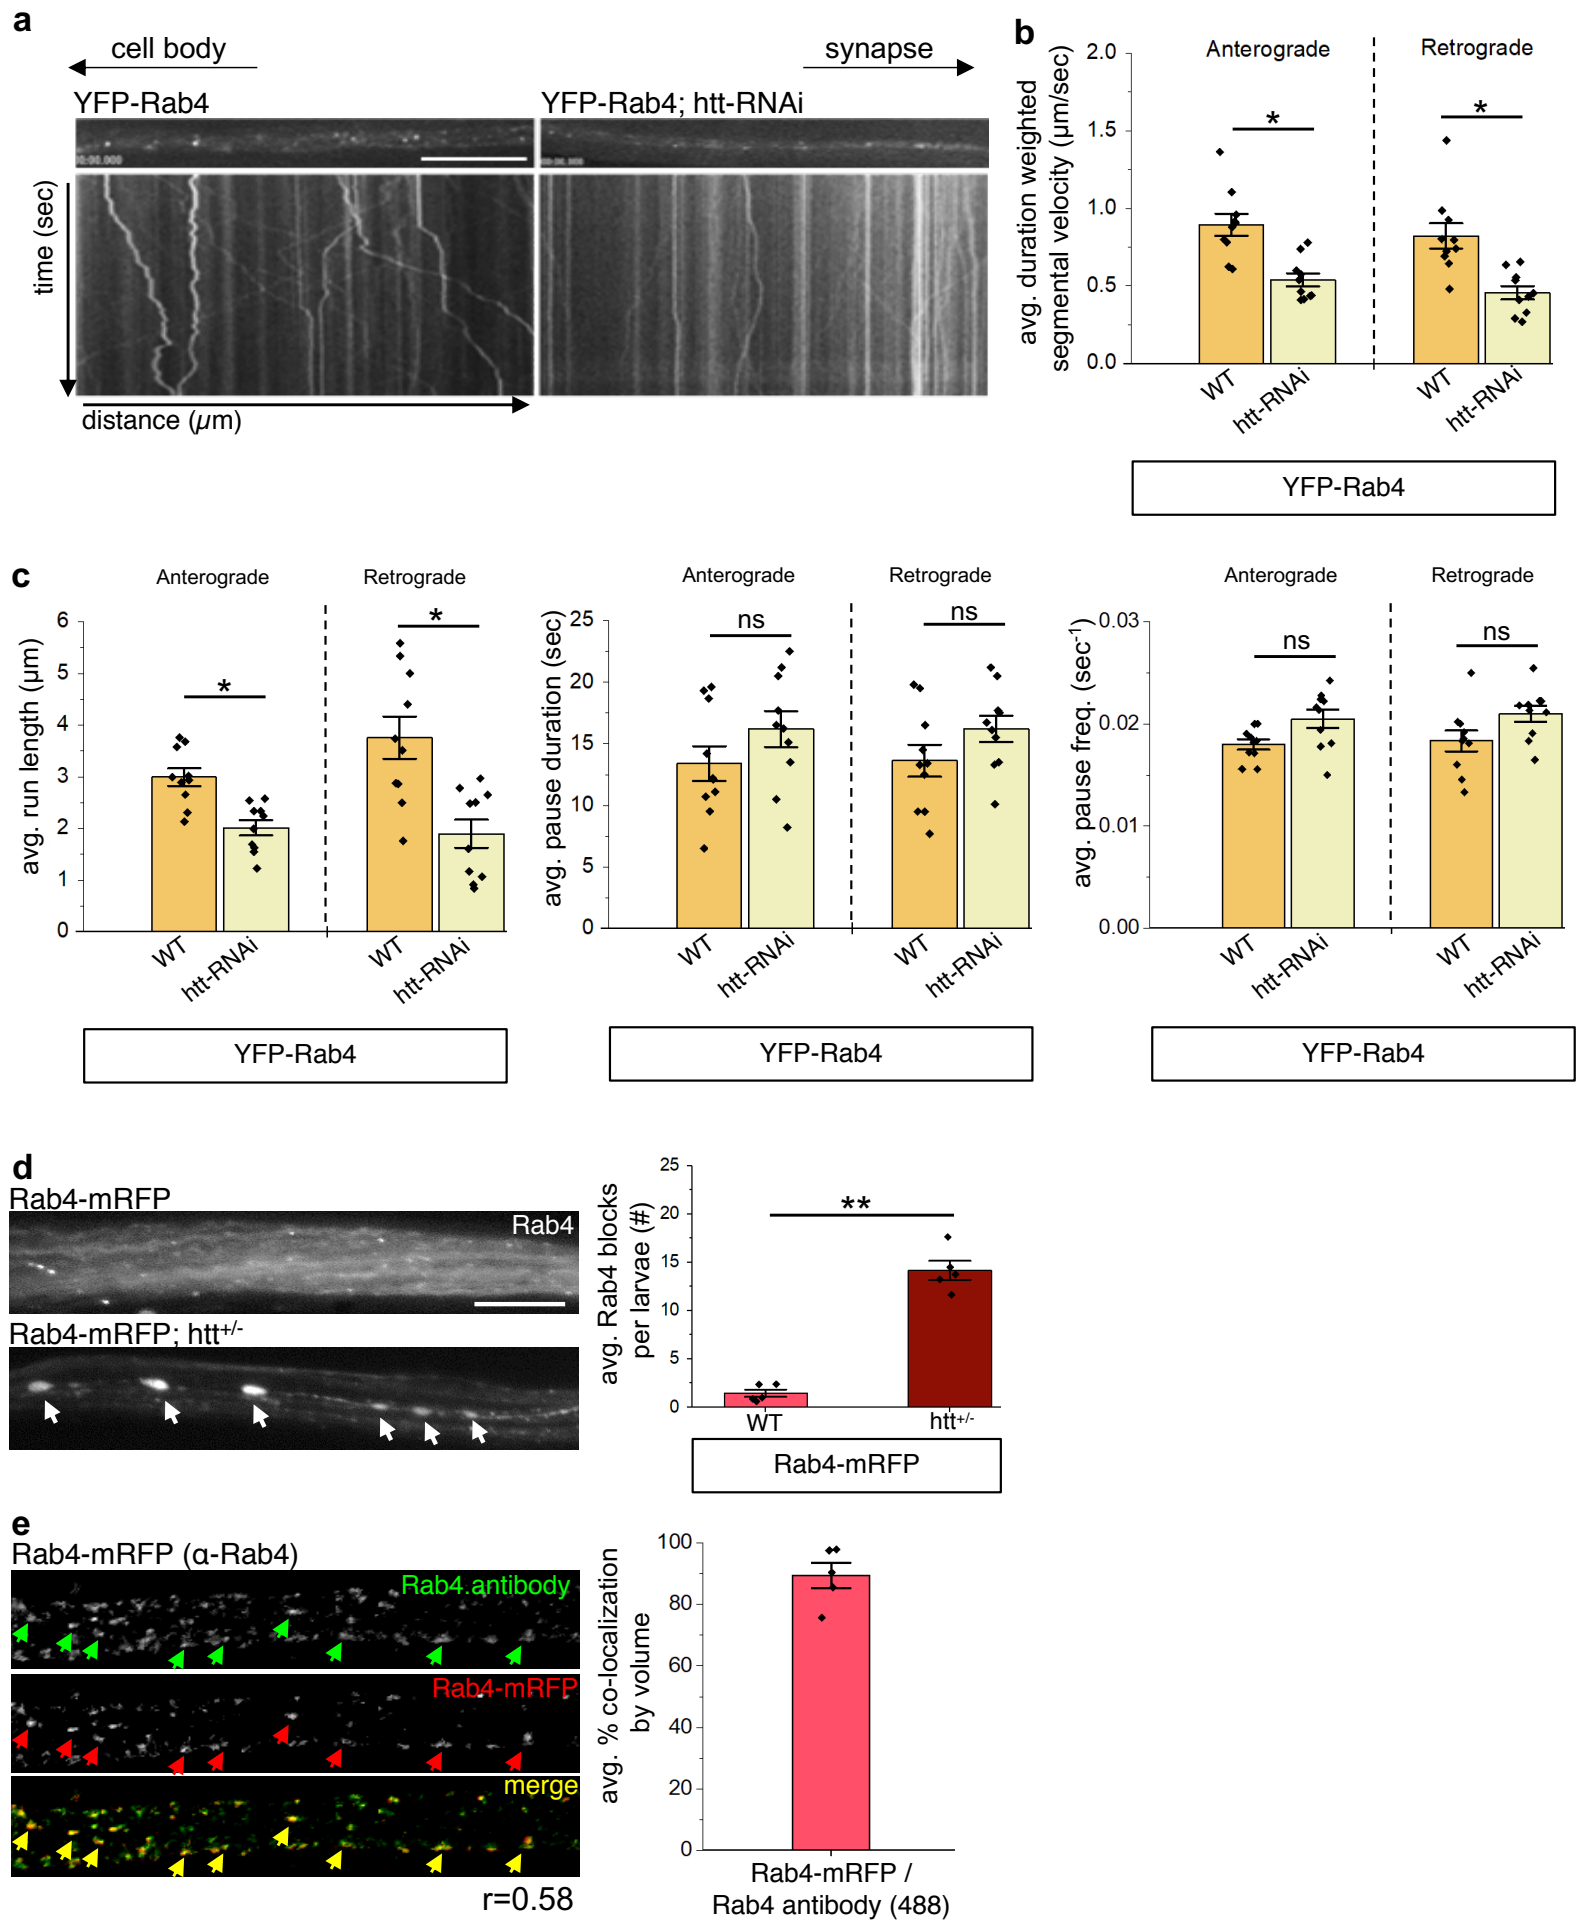

Figure.S2

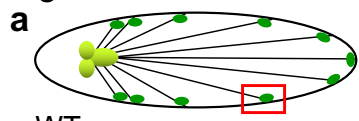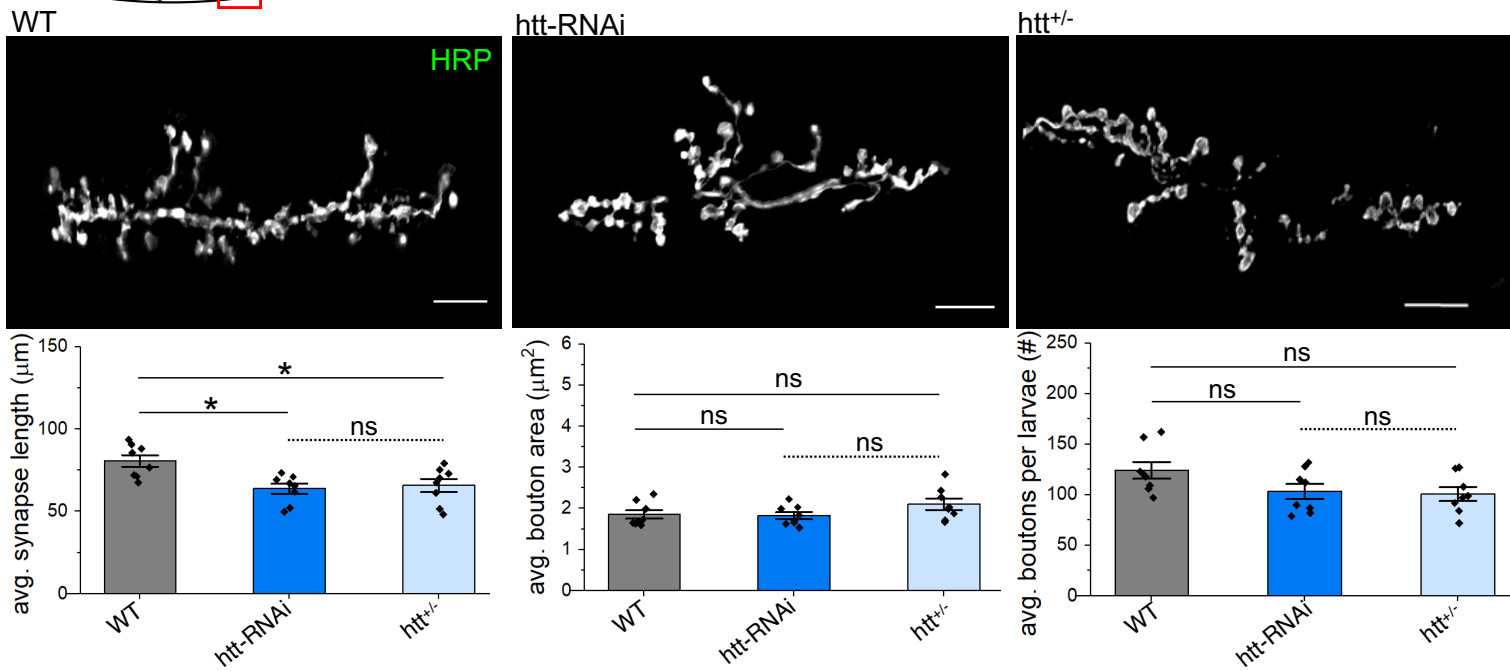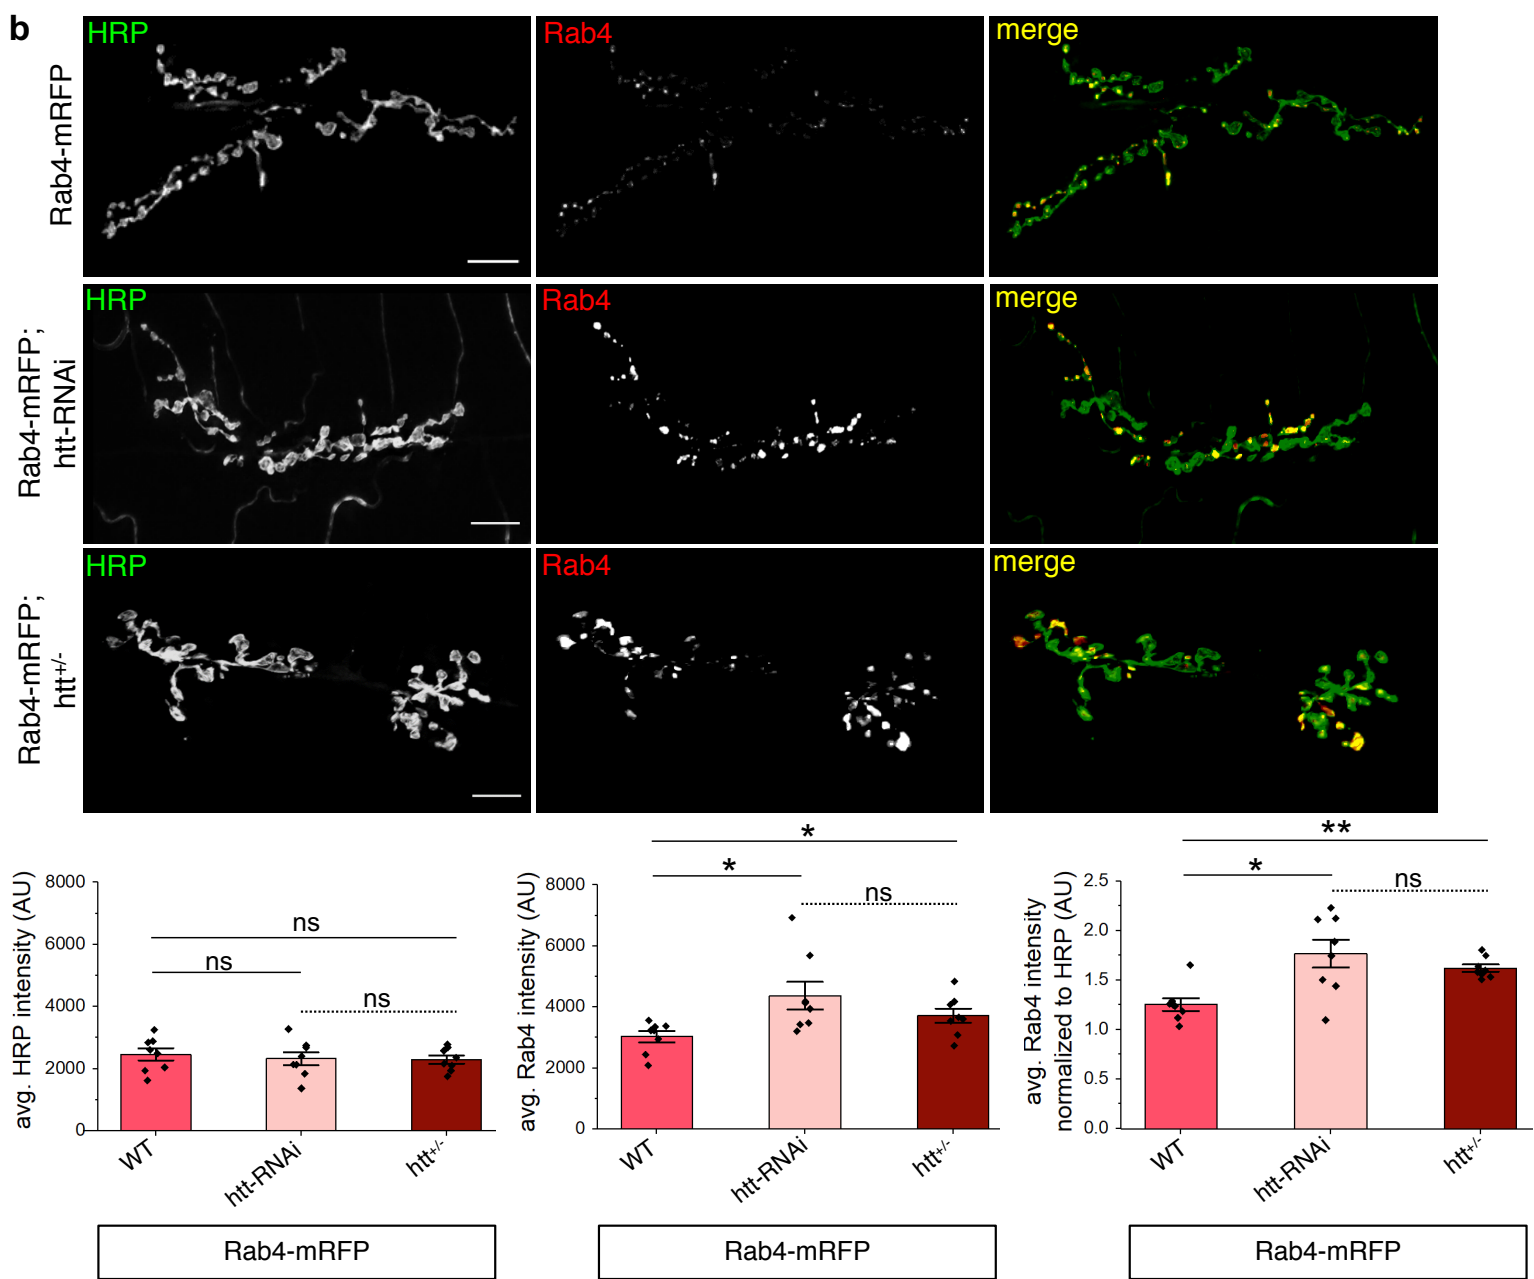

Figure.S3

**a**

Rab4-mRFP

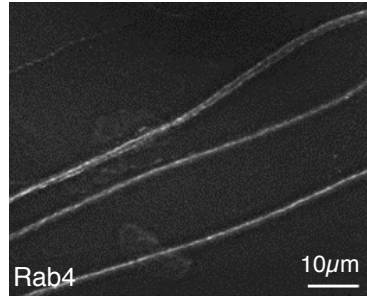

Rab4-mRFP; *klc*<sup>+/-</sup>

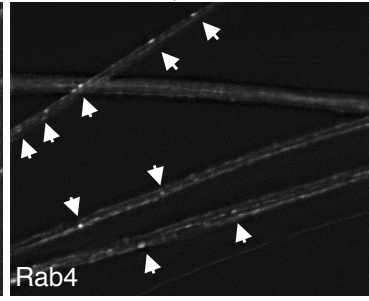

Rab4-mRFP; *klp64d*<sup>+/-</sup>

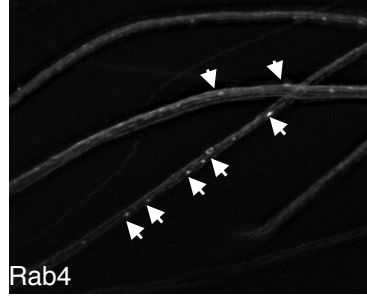

Rab4-mRFP; *unc-104*<sup>+/-</sup>

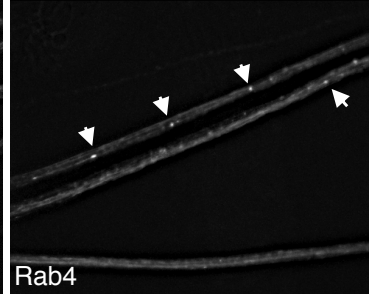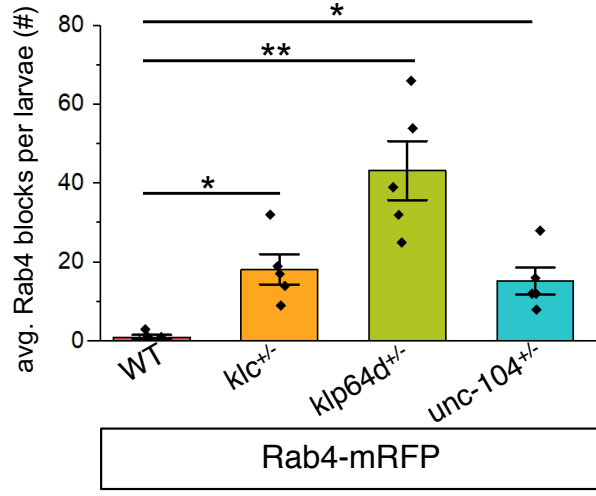

**b** Rab4-mRFP; *rip11*-GFP

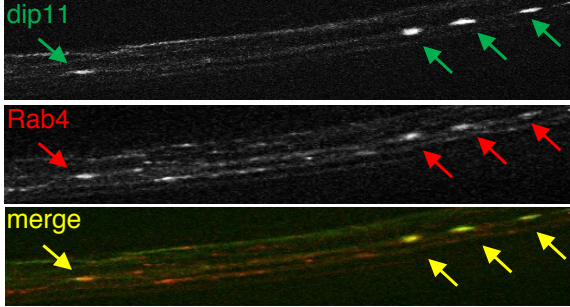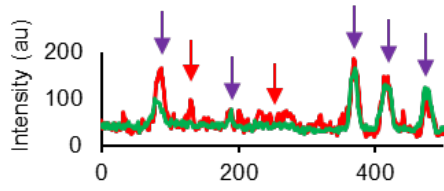



Figure.S4

**a**

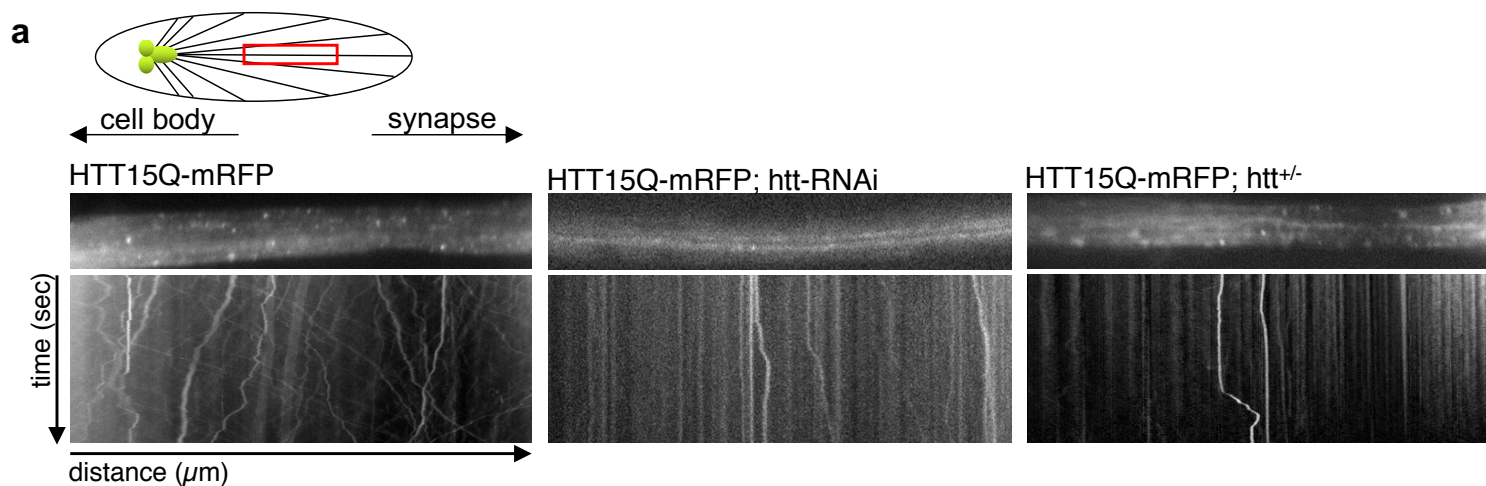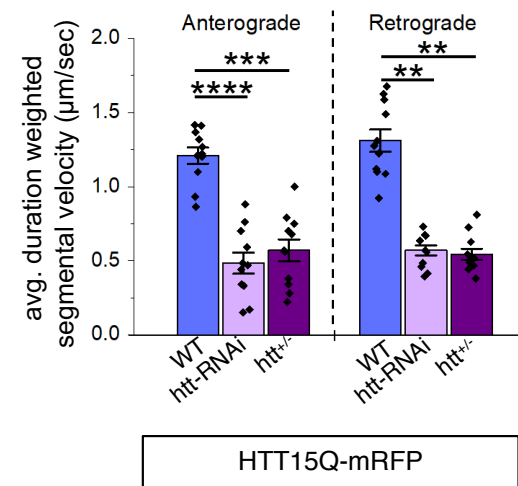

**b**

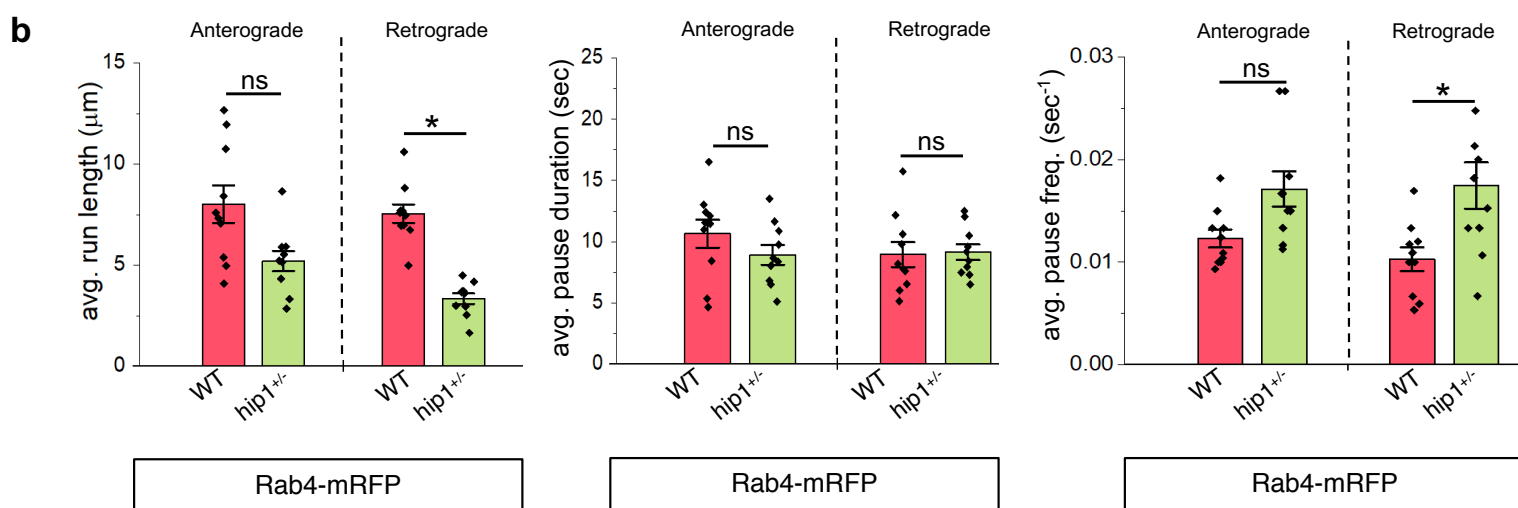

**c**

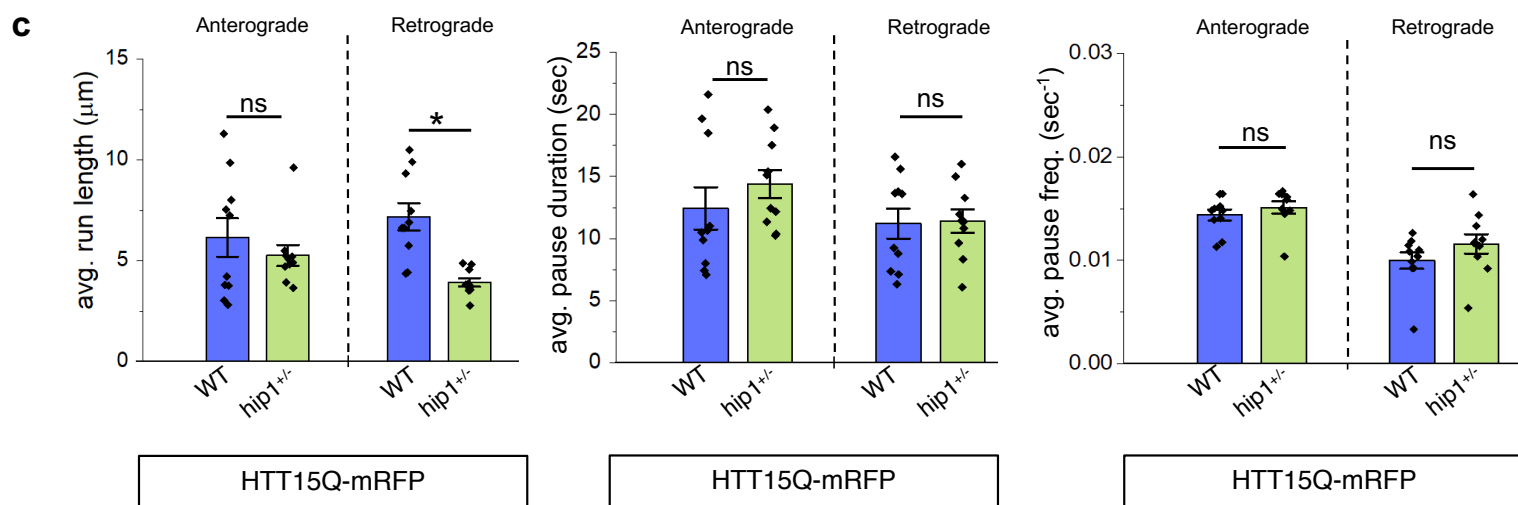

Figure.S5

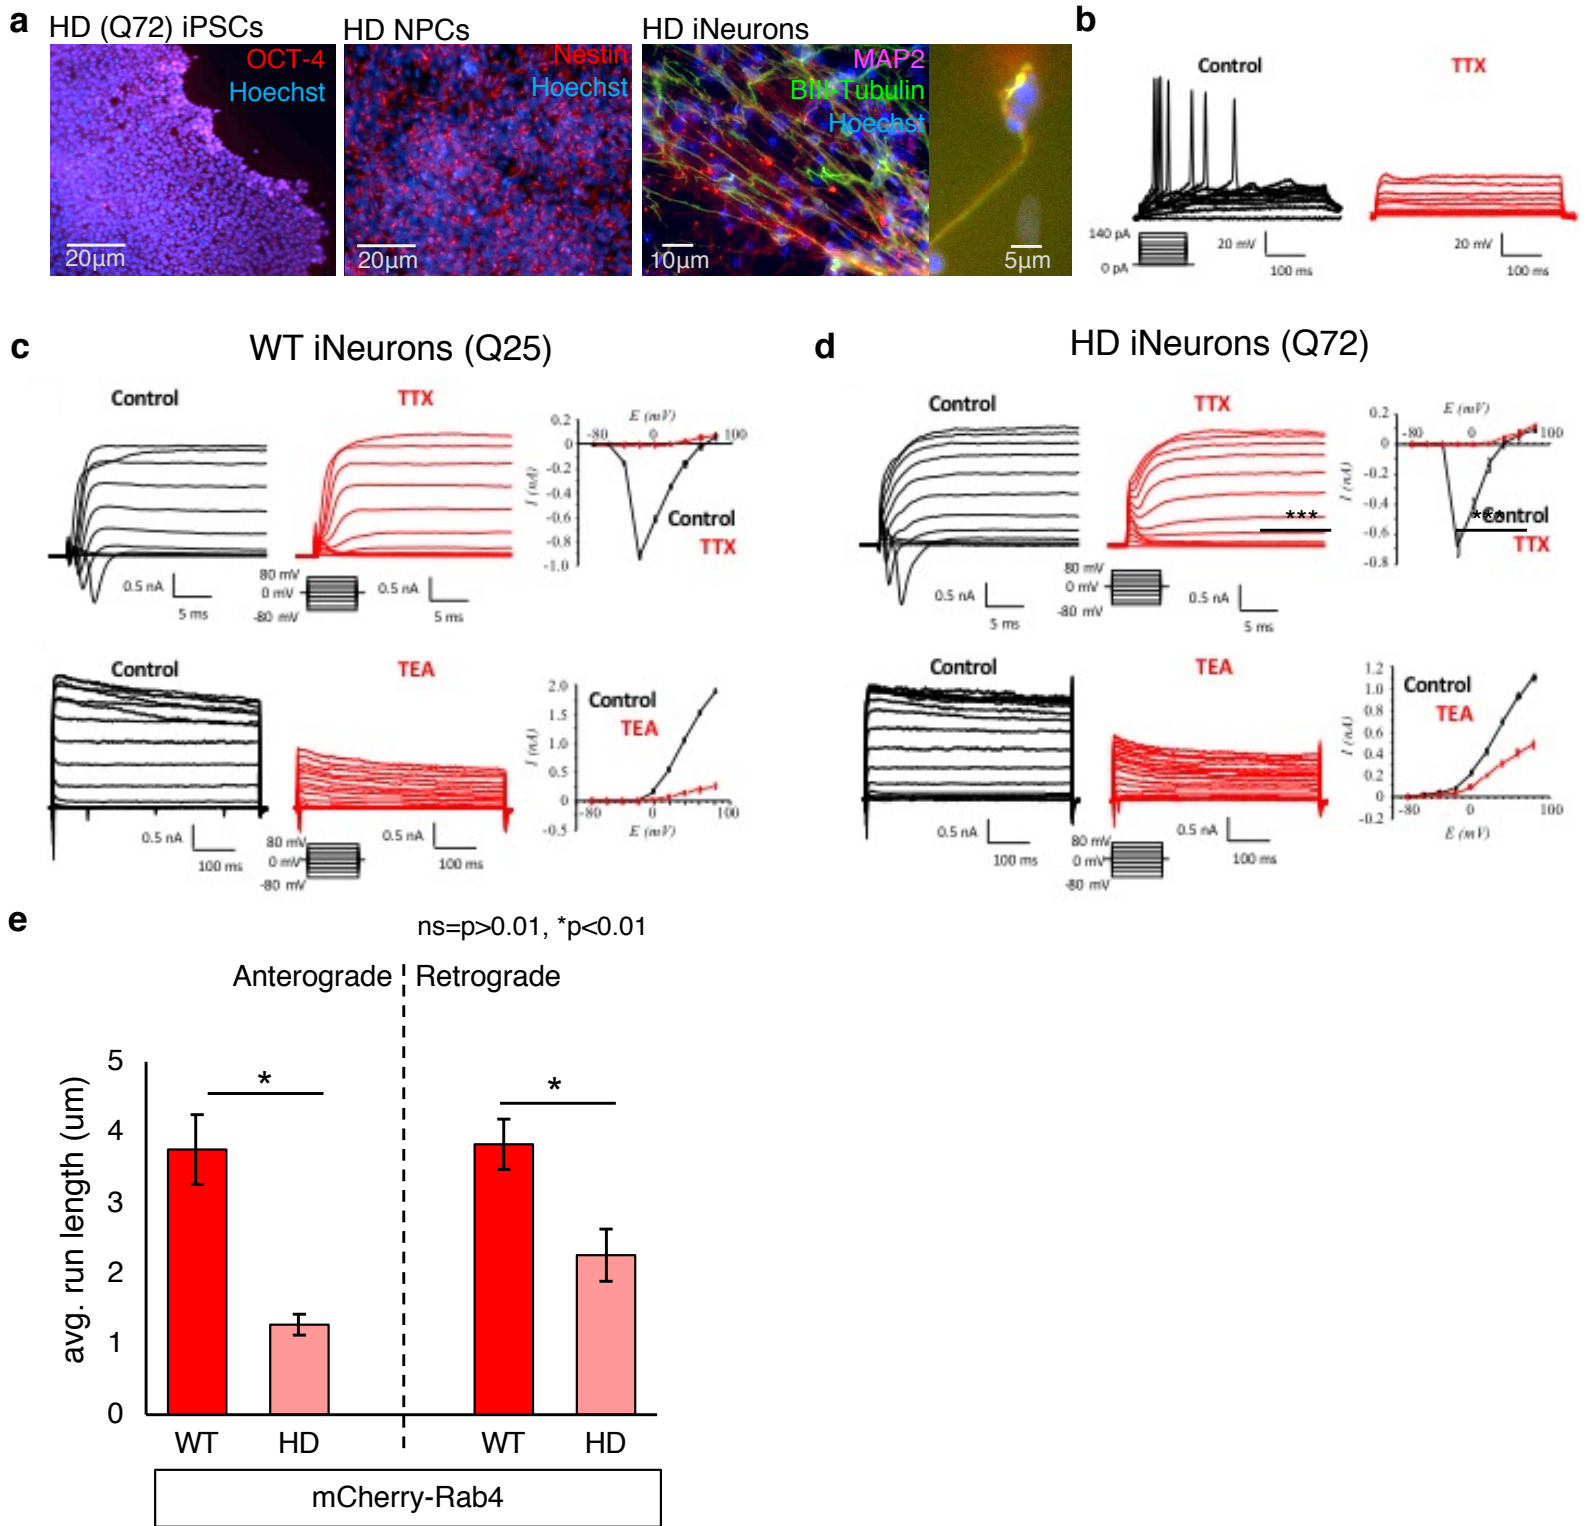

Figure.S6

**a** HD iNeuron (Q109)

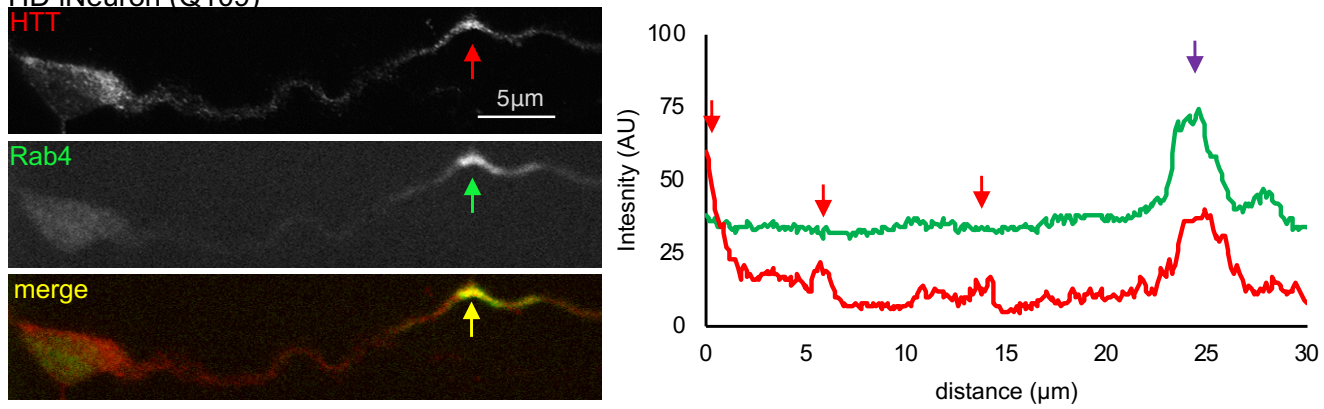

**b** WT iNeuron (Q25)

HD iNeuron (Q72)

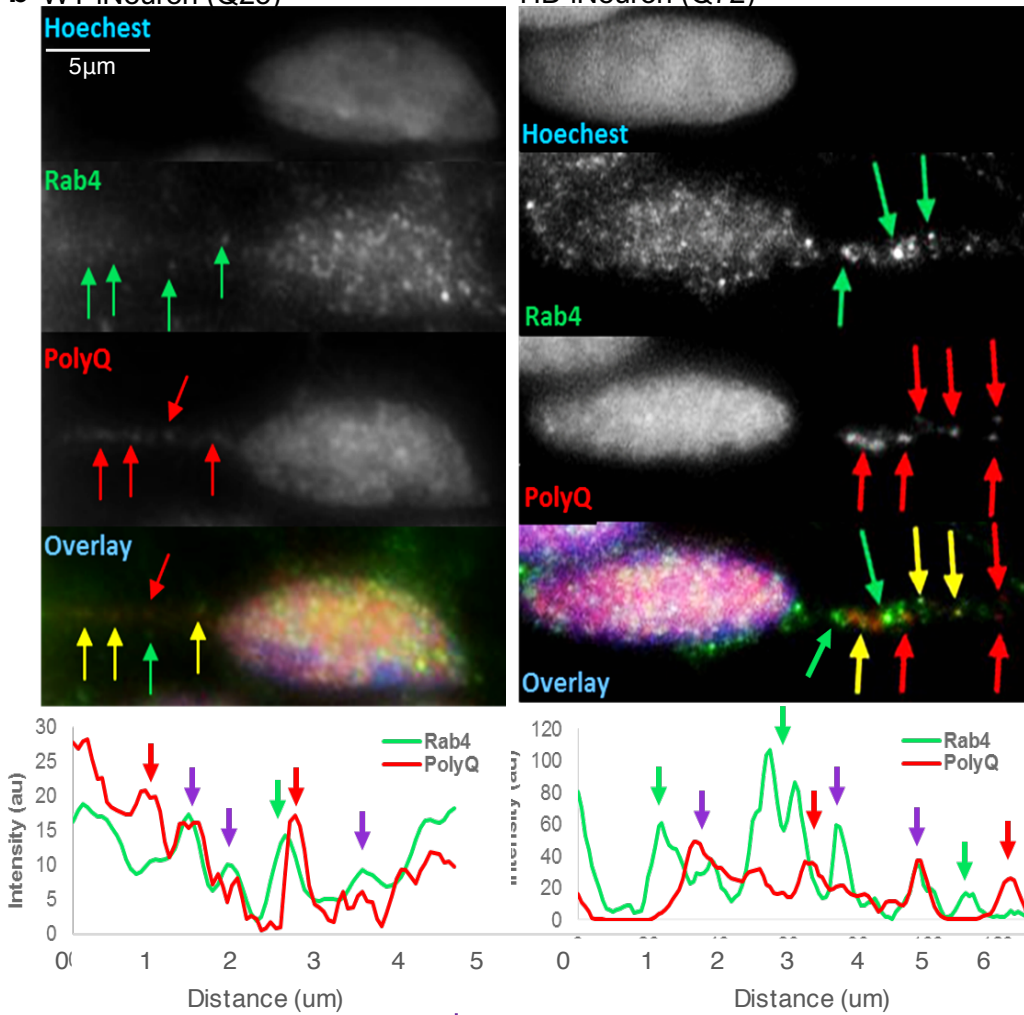

**c** WT neuron (Q25)

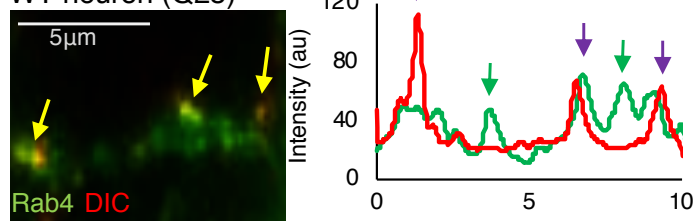

HD neuron (Q72)

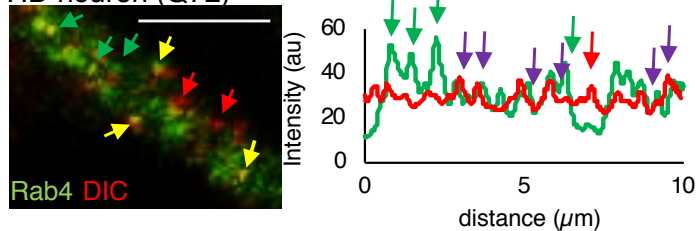

**d** WT neuron (Q25)

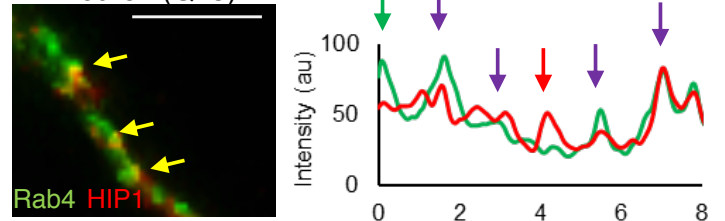

HD neuron (Q72)

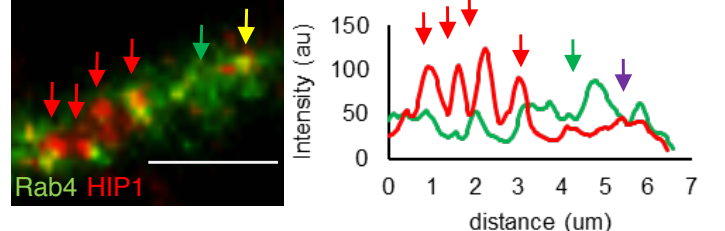

Figure.S7

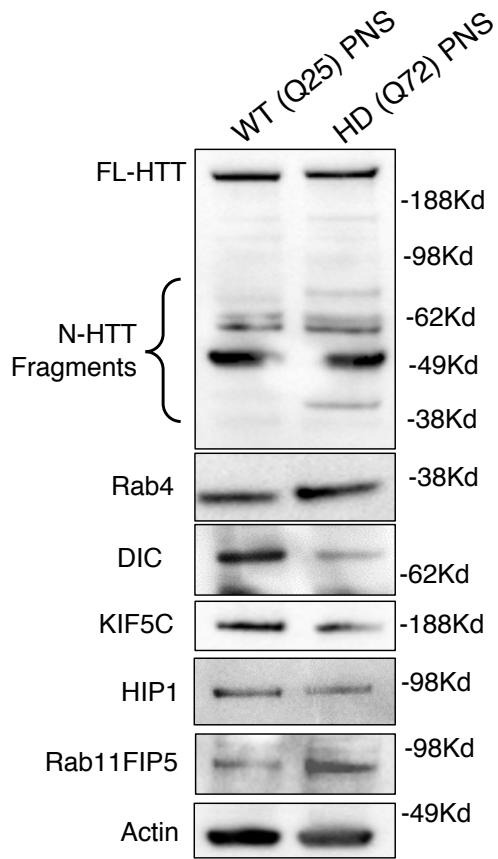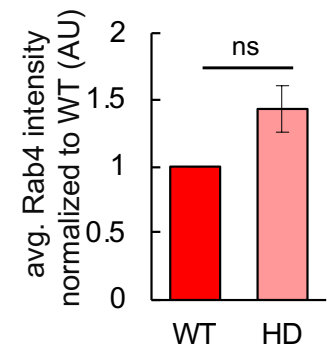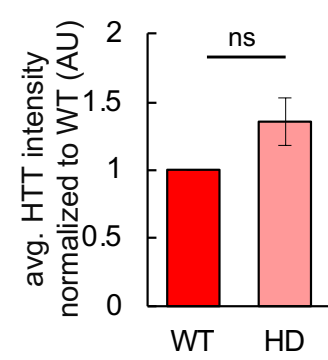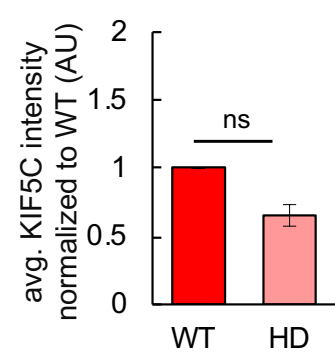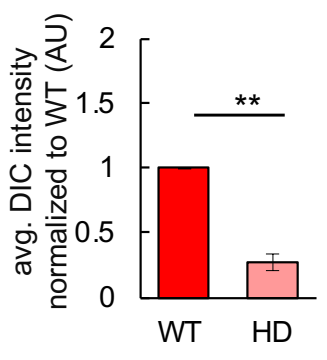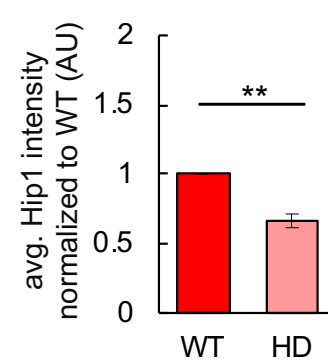

Figure.S8

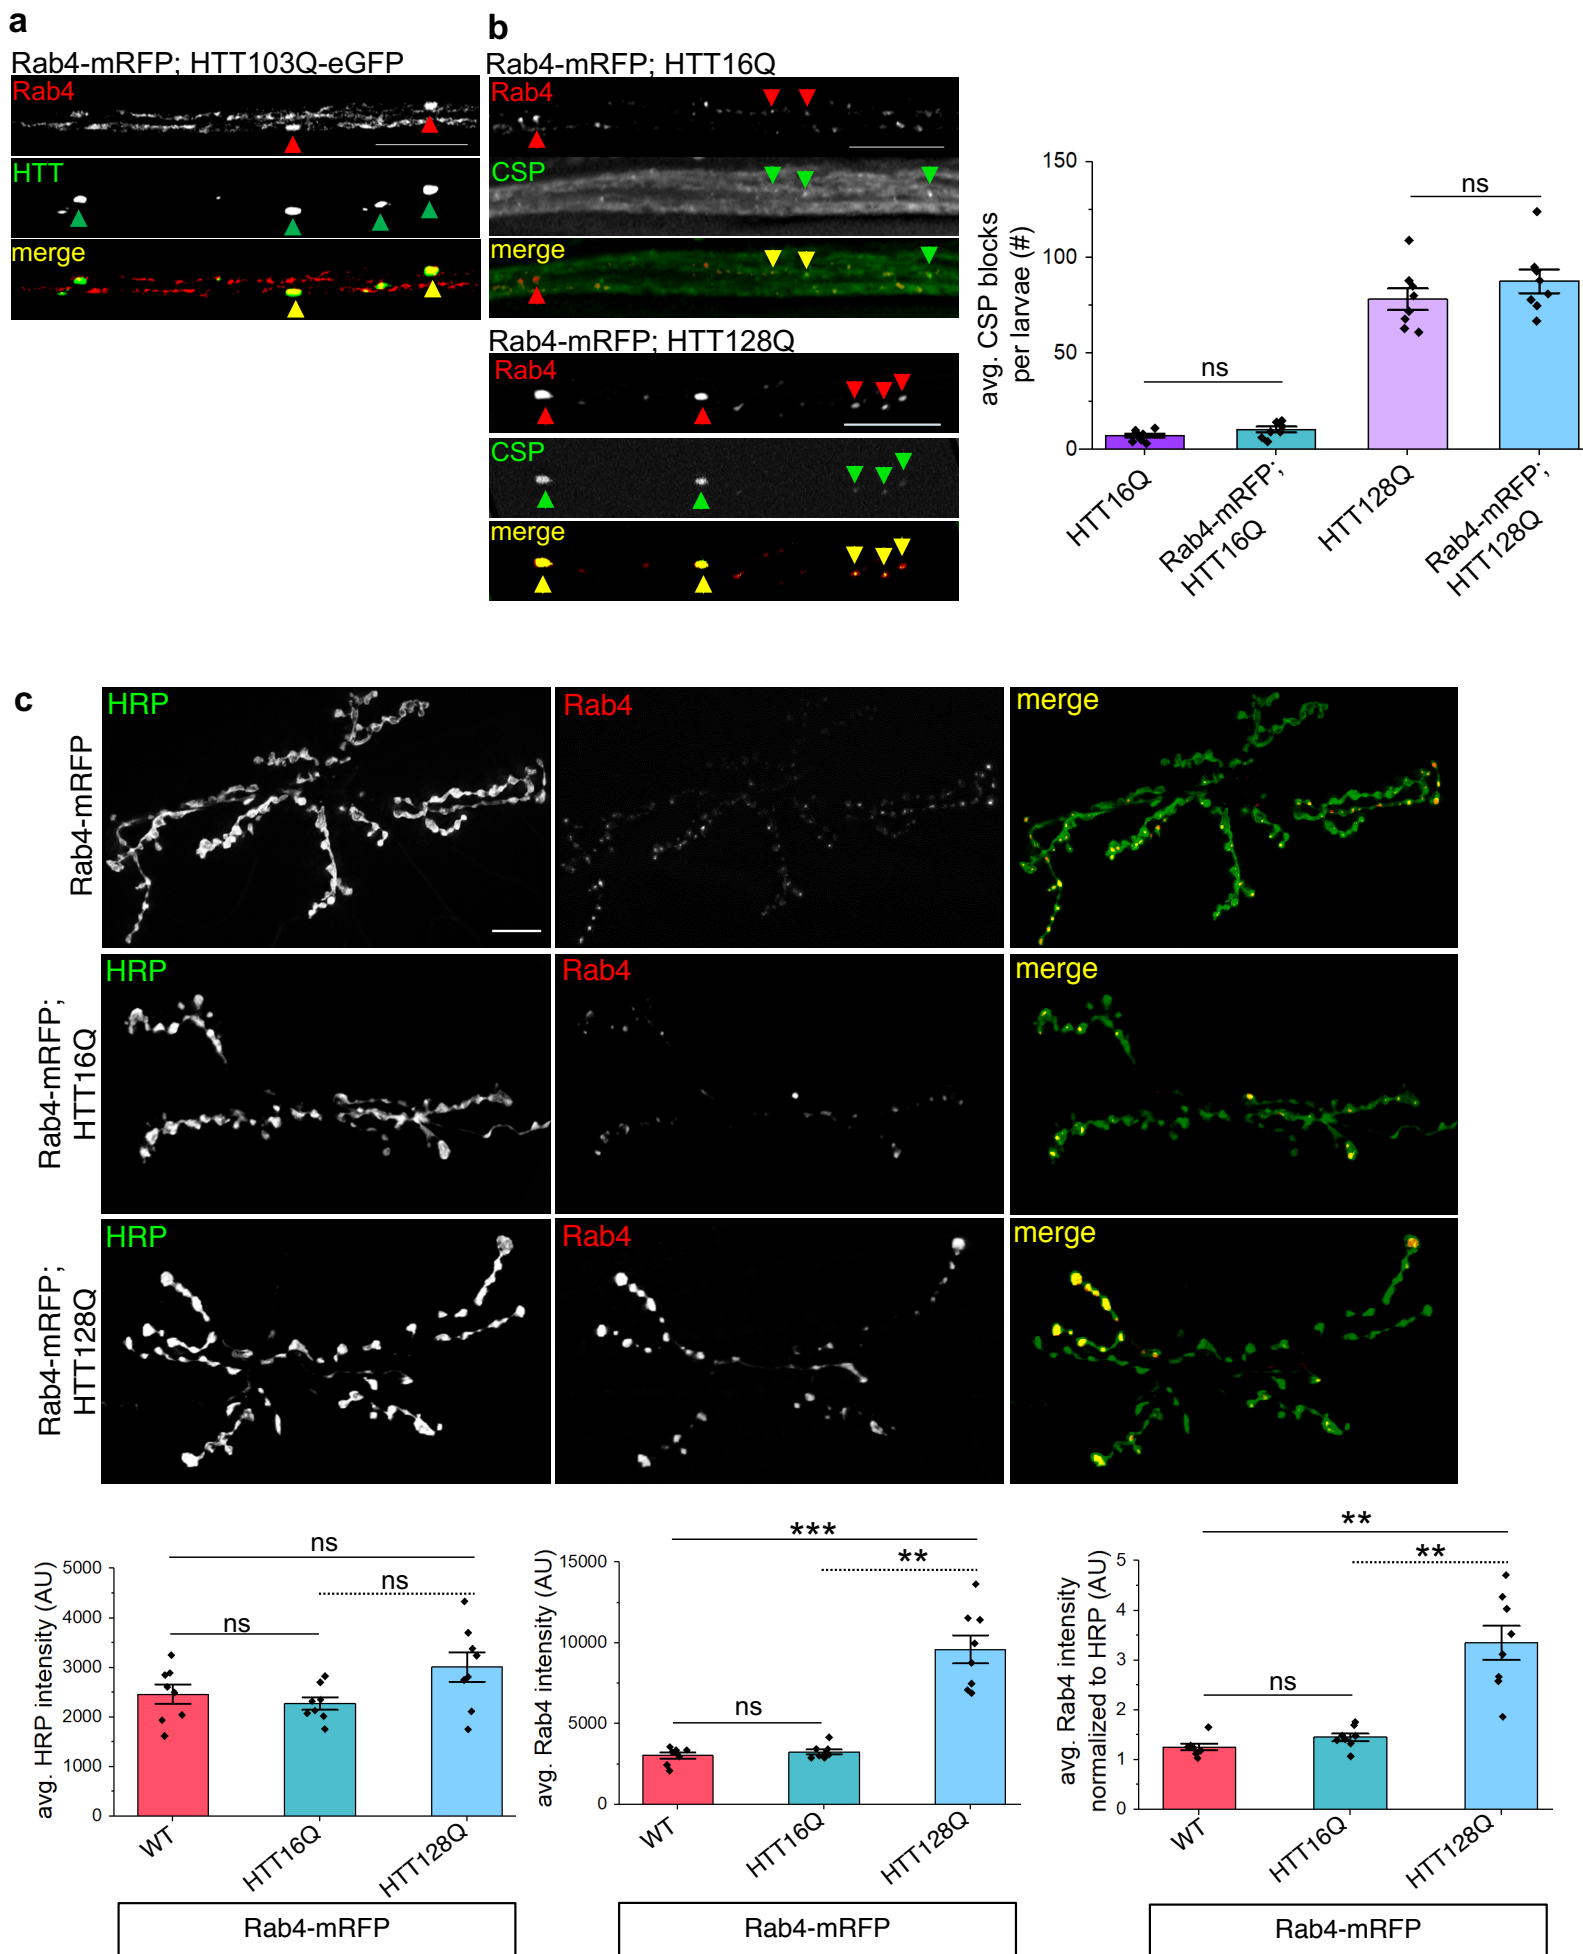

Figure.S9

**a Normal = Wildtype**

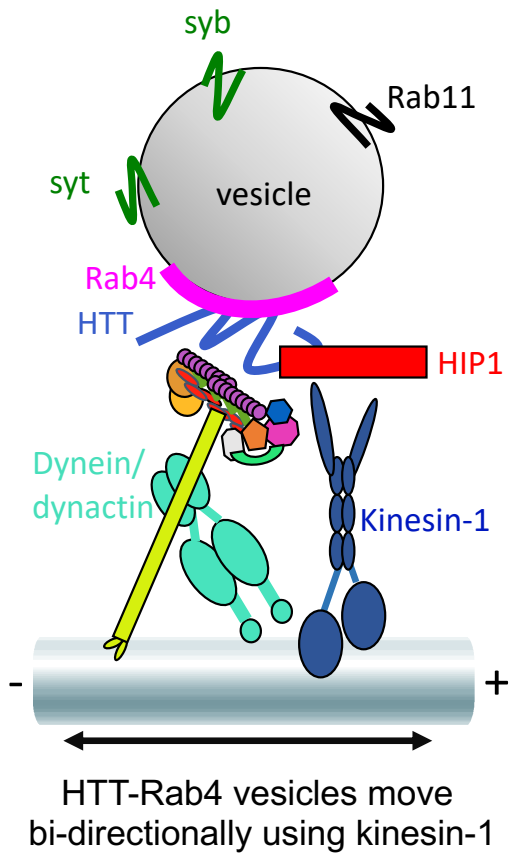

**b Huntington's Disease**

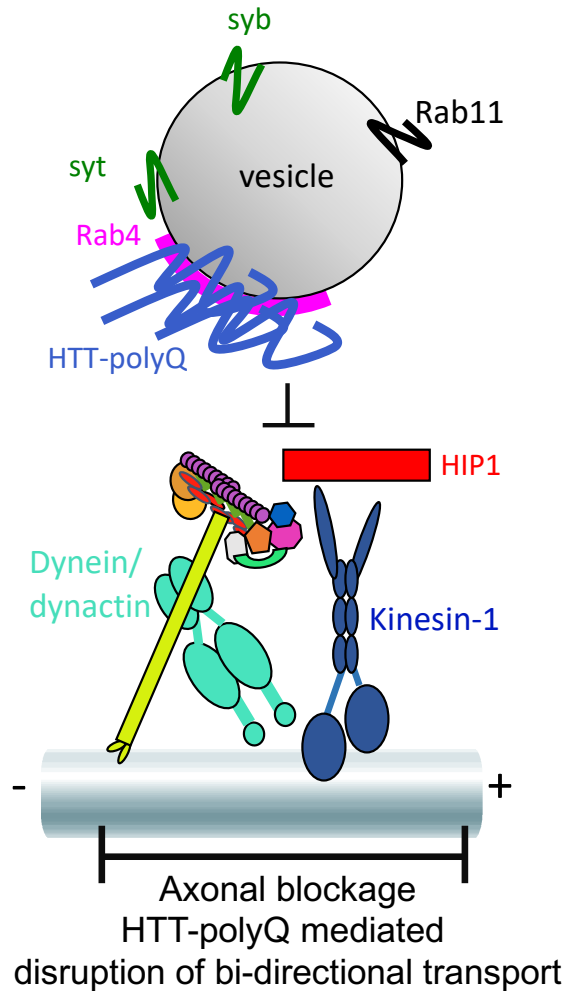

**Table S1: Key resources and reagents**

| RESOURCE                                | SOURCE                           | IDENTIFIER                          |
|-----------------------------------------|----------------------------------|-------------------------------------|
| <b>Antibodies and Dyes</b>              |                                  |                                     |
| Rabbit anti-klc                         | Laboratory of Lawrence Goldstein | Gindhart et. al., 1996              |
| Mouse anti-DIC (74.1)                   | Abcam                            | Cat# ab23905<br>RRID: AB_2096669    |
| Mouse anti-OCT-3/4 (C-10)               | Santa Cruz                       | Cat# sc-5279<br>RRID: AB_628051     |
| Mouse anti-Nestin                       | Santa Cruz                       | Cat# sc-23927<br>RRID: AB_627994    |
| Mouse anti-MAP2                         | BD Biosciences                   | Cat# 556320<br>RRID: AB_396359      |
| Mouse anti- $\beta$ III-tubulin (TUBB3) | Biolegend                        | Cat# 801212<br>RRID: AB_2721321     |
| Rabbit anti-Tyrosine Hydroxylase        | EMD Millipore                    | Cat# ab152<br>RRID: AB_390204       |
| Rabbit anti-Rab4 (monoclonal)           | Abcam                            | Cat# ab109009<br>RRID: AB_10887396  |
| Rabbit anti-Rab4 (polyclonal)           | Abcam                            | Cat# ab13252<br>RRID: AB_2269374    |
| Mouse anti-HIP1 (4B10)                  | Novus biological                 | Cat# NB300-203<br>RRID: AB_10000880 |
| Mouse anti-PolyQ (MW1)                  | EMD Millipore                    | Cat# MABN2427<br>RRID: N/A          |
| Rabbit anti-SYT1                        | Phosphosolutions                 | Cat# 1975-STG<br>RRID: AB_2492251   |
| Mouse anti-SYP (SY38)                   | Thermofisher                     | Cat# MAB5258<br>RRID: AB_2313839    |
| Mouse anti-KIF5C                        | Laboratory of Lawrence Goldstein | Xia et. al., 1998                   |
| Rabbit anti-Actin                       | Thermofisher                     | Cat# MA5-32479<br>RRID: AB_2809756  |
| Mouse anti-Tubulin (DM1A)               | Abcam                            | Cat# ab7291<br>RRID: AB_2241126     |
| Mouse anti-HTT (1HU-4C8)                | EMD Millipore                    | Cat# MAB2166<br>RRID: AB_2123255    |
| Rabbit anti-HTT (EP867Y)                | Abcam                            | Cat# ab45169<br>RRID: AB_733062     |
| Mouse anti-KDEL (10C3)                  | Abcam                            | Cat# ab12223<br>RRID: AB_298945     |
| Mouse anti-Golgi (7H6D7C2)              | Millipore Sigma                  | Cat# 345867<br>RRID: AB_564660      |
| Mouse anti-Cytochrome C (A-8)           | Santa Cruz                       | Cat# sc-13156<br>RRID: AB_627385    |
| Rabbit anti-Rab11-FIP5                  | Thermofisher                     | Cat# PA5-31790<br>RRID: AB_2549263  |
| Mouse anti-HAP1 (C-3)                   | Santa Cruz                       | Cat# sc-166245<br>RRID: AB_2116129  |
| Rabbit anti-Rab11                       | Abcam                            | Cat# ab3612<br>RRID: AB_10861613    |
| Rabbit anti-Rab5                        | Abcam                            | Cat# ab18211<br>RRID: AB_470264     |
| Rat anti-Syntaxin17                     | Laboratory of Gabor Juhasz       | Takats et. al., 2013                |

**Table S1: Key resources and reagents**

|                                                      |                                                                   |                                                   |
|------------------------------------------------------|-------------------------------------------------------------------|---------------------------------------------------|
| Mouse anti-DCSP-3 (1G12)                             | Developmental Studies Hybridoma Bank                              | Cat# DCSP-3 (1G12)<br>RRID: AB_528184             |
| Anti-Mouse Alexa Fluor® 488                          | Thermofisher                                                      | Cat# A11001<br>RRID: AB_2534069                   |
| Anti-Mouse Alexa Fluor® 568                          | Thermofisher                                                      | Cat# A11004<br>RRID: AB_2534072                   |
| Anti-Mouse Alexa Fluor® 647                          | Thermofisher                                                      | Cat# A21235<br>RRID: AB_2535804                   |
| Anti-Rabbit Alexa Fluor® 488                         | Thermofisher                                                      | Cat# A11008<br>RRID: AB_143165                    |
| Anti-Rabbit Alexa Fluor® 568                         | Thermofisher                                                      | Cat# A11011<br>RRID: AB_143157                    |
| Anti-Rabbit Alexa Fluor® 647                         | Thermofisher                                                      | Cat# A21244<br>RRID: AB_141663                    |
| Anti-Mouse secondary antibody, HRP                   | Thermofisher                                                      | Cat# 32430<br>RRID: AB_1185566                    |
| Anti-Rabbit secondary antibody, HRP                  | Thermofisher                                                      | Cat# 32460<br>RRID: AB_1185567                    |
| Alexa Fluor® 594 Goat Anti-Horseradish Peroxidase    | Jackson ImmunoResearch Labs                                       | Cat# 123-585-021<br>RRID: AB_2338966              |
| Fluorescein (FITC) Goat Anti-Horseradish Peroxidase  | Jackson ImmunoResearch Labs                                       | Cat# 123-095-021<br>RRID: AB_2314647              |
| Hoechst                                              | Thermofisher                                                      | Cat# H3570<br>RRID: AB_10626776                   |
| <b>Bacterial and Virus Strains</b>                   |                                                                   |                                                   |
| mCherry-Rab4a-7                                      | Laboratory of Michael Davidson<br><br>De Franceschi et. al., 2016 | Addgene<br>Plasmid # 55125<br>RRID: Addgene_55125 |
| <b>Biological Samples</b>                            |                                                                   |                                                   |
| Mouse brain tissue (C57BL/6)                         | Laboratory of Kathryn Medler                                      | Jackson Laboratory,<br>Stock No:000664            |
| <b>Chemicals, Peptides, and Recombinant Proteins</b> |                                                                   |                                                   |
| Lipofectamine 3000                                   | Fisher                                                            | Cat# L3000015<br>RRID: N/A                        |
| Corning Matrigel                                     | Fisher                                                            | Cat# CB40230A<br>RRID: N/A                        |
| Advanced DMEM/F12                                    | Invitrogen                                                        | Cat# 12634028<br>RRID: N/A                        |
| Essential 8 media                                    | Invitrogen                                                        | Cat# A1517001<br>RRID: N/A                        |
| Neurobasal media                                     | Invitrogen                                                        | Cat# 21103049<br>RRID: N/A                        |
| PSC neural induction media                           | Invitrogen                                                        | Cat# A1647801<br>RRID: N/A                        |
| B27 supplement media                                 | Invitrogen                                                        | Cat# 17504-044<br>RRID: N/A                       |



**Table S1: Key resources and reagents**

|                                                                      |                                                                                 |                                      |
|----------------------------------------------------------------------|---------------------------------------------------------------------------------|--------------------------------------|
| Protease inhibitor cocktail                                          | Pierce                                                                          | Cat# PIA32965<br>RRID: N/A           |
| Phosphatase Inhibitor                                                | Pierce                                                                          | Cat# PI88667<br>RRID: N/A            |
| Protein A/G Magnetic Beads                                           | Pierce                                                                          | Cat# PI88802<br>RRID: N/A            |
| Vecta Shield Mounting Medium                                         | Fisher                                                                          | Cat# NC9265087<br>RRID: N/A          |
| <b>Experimental Models: Human Cell Lines</b>                         |                                                                                 |                                      |
| GM23279, polyQ=25, 26y, female                                       | NIGMS Repository<br>(Coriell Institute for<br>Medical Research -<br>Camden, NJ) | Cat# GM23279<br>RRID: CVCL_F178      |
| GM23225, polyQ=72, 20y, female                                       | NIGMS Repository<br>(Coriell Institute for<br>Medical Research -<br>Camden, NJ) | Cat# GM23225<br>RRID: CVCL_F169      |
| ND38555, polyQ=17, 48y, female                                       | NINDS Repository<br>(Coriell Institute for<br>Medical Research -<br>Camden, NJ) | Cat# ND3855<br>RRID: CVCL_Y822       |
| ND42222, polyQ=109, 9y, female                                       | NINDS Repository<br>(Coriell Institute for<br>Medical Research -<br>Camden, NJ) | Cat# ND42222<br>RRID: CVCL_Y844      |
| <b>Experimental Models: <i>D. melanogaster</i> Organisms/Strains</b> |                                                                                 |                                      |
| P{Appl-GAL4.G1a}1, y <sub>1</sub> w <sup>*</sup>                     | Bloomington Drosophila<br>Stock Center                                          | BDSC: 32040;<br>FlyBase: FBst0032040 |
| Appl-GAL4; T(2,3), CyO, TM6B, Tb <sub>1</sub> / Pin <sup>88k</sup>   | Laboratory of Lawrence<br>Goldstein                                             | Gunawardena &<br>Goldstein, 2001     |
| w <sup>*</sup> ; P{UAS-Rab4-mRFP}2                                   | Bloomington Drosophila<br>Stock Center                                          | BDSC: 8505;<br>FlyBase: FBst0008505  |
| y <sub>1</sub> w <sup>*</sup> ; P{UASp-YFP.Rab4}09                   | Bloomington Drosophila<br>Stock Center                                          | BDSC: 23269;<br>FlyBase: FBst0023269 |
| UAS-htt-RNAi (UAS-dHTT-RNAi)                                         | Laboratory of Lawrence<br>Goldstein                                             | Gunawardena et. al.,<br>2003         |
| Df(98E2); CG9990 / TM3 (htt <sup>+/-</sup> )                         | Laboratory of<br>Norbert Perrimon                                               | Zhang et. al., 2009                  |
| y <sub>1</sub> w <sup>*</sup> ; Mi{MIC}Rab4 <sup>MI10530</sup>       | Bloomington Drosophila<br>Stock Center                                          | BDSC: 55497;<br>FlyBase: FBst0055497 |
| pUAST-HTT15Q-mRFP                                                    | Laboratory of<br>Troy Littleton                                                 | Weiss et. al., 2012                  |
| pUAST-HTTex1-25Q-eGFP                                                | Laboratory of<br>Norbert Perrimon                                               | Zhang et. al., 2010                  |
| y <sub>1</sub> w <sup>*</sup> ; P{UAS-APP.YFP}LG                     | Bloomington Drosophila<br>Stock Center                                          | BDSC: 32039;<br>FlyBase: FBst0032039 |
| w <sup>*</sup> ; P{UAS-Syt-eGFP}3                                    | Bloomington Drosophila<br>Stock Center                                          | BDSC: 6926;<br>FlyBase: FBst0006926  |
| w <sup>*</sup> ; P{GawB}D42, P{UAS-nSyb-GFP.E}3/TM3, Sb <sub>1</sub> | Bloomington Drosophila<br>Stock Center                                          | BDSC: 9263;<br>FlyBase: FBst0009263  |
| y <sub>1</sub> w <sup>*</sup> ; P{UASp-YFP.Rab3} lolal <sub>02</sub> | Bloomington Drosophila<br>Stock Center                                          | BDSC: 9762;<br>FlyBase: FBst0009762  |

**Table S1: Key resources and reagents**

|                                                                                             |                                                                                          |                                                             |
|---------------------------------------------------------------------------------------------|------------------------------------------------------------------------------------------|-------------------------------------------------------------|
| w <sup>+</sup> ; P{UAS-Rab11-GFP}2                                                          | Bloomington Drosophila Stock Center                                                      | BDSC: 8506;<br>FlyBase: FBst0008506                         |
| klc8 <sup>ex94</sup> / TM6B                                                                 | Laboratory of Lawrence Goldstein                                                         | Gindhart et. al., 1998                                      |
| roblk / B3                                                                                  | Laboratory of Lawrence Goldstein                                                         | Bowman et. al., 1999                                        |
| y <sup>1</sup> w <sup>1</sup> ; klp64D <sup>k1</sup> / TM3, y <sup>+</sup> Ser <sup>1</sup> | Bloomington Drosophila Stock Center                                                      | BDSC: 5578;<br>FlyBase: FBst0005578                         |
| w <sup>1118</sup> ; P{XP}unc-104 <sup>d11204</sup> / CyO                                    | Bloomington Drosophila Stock Center                                                      | BDSC: 19346;<br>FlyBase: FBst0019346                        |
| y <sup>1</sup> W <sup>67c23</sup> ; P{lacW}milt <sup>k04704</sup> / CyO                     | Bloomington Drosophila Stock Center                                                      | BDSC: 10553;<br>FlyBase: FBst0010553                        |
| w <sup>1118</sup> ; Mi{ET1}hip <sup>1</sup> <sub>MB04365</sub>                              | Bloomington Drosophila Stock Center                                                      | BDSC: 24809;<br>FlyBase: FBst0024809                        |
| y <sup>1</sup> w <sup>+</sup> ; P{lacW}nmOP <sup>1</sup> / TM3, Sb <sup>1</sup>             | Bloomington Drosophila Stock Center                                                      | BDSC: 27897;<br>FlyBase: FBst0027897                        |
| w <sup>1118</sup> ; Mi{ET1}nuf <sup>MB09772</sup>                                           | Bloomington Drosophila Stock Center                                                      | BDSC: 27803;<br>FlyBase: FBst0027803                        |
| y <sup>1</sup> P{SUPor-P}rip <sup>11</sup> <sub>KG02485</sub> / FM7c, sn <sup>+</sup>       | Bloomington Drosophila Stock Center                                                      | BDSC: 13742;<br>FlyBase: FBst0013742                        |
| pUAST-rip11-GFP.CT                                                                          | Laboratory of Donald Ready                                                               | Li et. al., 2007                                            |
| w <sup>1118</sup> ; P{UAS-HTT.16Q.FL}F24 / CyO                                              | Bloomington Drosophila Stock Center                                                      | BDSC: 33810;<br>FlyBase: FBst0033810                        |
| w <sup>1118</sup> ; P{UAS-HTT.128Q.FL}f27b                                                  | Bloomington Drosophila Stock Center                                                      | BDSC: 33808;<br>FlyBase: FBst0033808                        |
| pUAST-HTTex1-72Q-eGFP                                                                       | Laboratory of Norbert Perrimon                                                           | Zhang et. al., 2010                                         |
| pUAST-HTTex1-103Q-eGFP                                                                      | Laboratory of Norbert Perrimon                                                           | Zhang et. al., 2010                                         |
| pUAST-HTT138Q-mRFP                                                                          | Laboratory of Troy Littleton                                                             | Weiss et. al., 2012                                         |
|                                                                                             |                                                                                          |                                                             |
| <b>Software / Algorithms</b>                                                                |                                                                                          |                                                             |
| MATLAB-based particle tracking program                                                      | Laboratories of Gaudenz Danuser and Lawrence Goldstein                                   | Yang et. al., 2005, Reis et al 2012, Gunawardena et al 2013 |
| ImageJ                                                                                      | Schneider et. al., 2012<br><a href="https://www.imagej.net/">https://www.imagej.net/</a> | RRID: SCR_003070                                            |
| Metamorph / Metavue Imaging Software                                                        | Molecular Devices, Sunnyvale, CA, USA                                                    | RRID: SCR_002368                                            |
| Minitab18                                                                                   | <a href="https://www.minitab.com/en-us/">https://www.minitab.com/en-us/</a>              | RRID: SCR_014483                                            |
| Microsoft Excel                                                                             | <a href="https://www.microsoft.com/en-gb/">https://www.microsoft.com/en-gb/</a>          | RRID: SCR_016137                                            |
| RStudio                                                                                     | <a href="http://www.rstudio.com/">http://www.rstudio.com/</a>                            | RRID:SCR_000432                                             |
| OriginLab / OriginPro                                                                       | <a href="https://www.originlab.com/">https://www.originlab.com/</a>                      | RRID: SCR_014212                                            |
